# Supplementary material for: Simulations of Snow Physicochemical Properties in Northern China using WRF-Chem
Source: Copernicus journal article supplement (doi:10.5194/gmd-2024-37), 2024-05-24
Supplement: Supplementary file 1 [file gmd-2024-37-supplement.pdf]

Supplement of

## **Simulations of Snow Physicochemical Properties in Northern China using WRF-Chem**

Xia Wang<sup>1</sup>, Tao Che<sup>2,3</sup>, Xueyin Ruan<sup>1</sup>, Shanna Yue<sup>2,3</sup>, Jing Wang<sup>2,3</sup>, Chun Zhao<sup>1,4,5\*</sup>,  
Lei Geng<sup>1,4,5\*</sup>

<sup>1</sup>School of Earth and Space Sciences, University of Science and Technology of China, Hefei 230026, Anhui, China

<sup>2</sup>Key Laboratory of Remote Sensing of Gansu Province, Heihe Remote Sensing Experimental Research Station, Northwest Institute of Eco-Environment and Resources, Chinese Academy of Sciences, Lanzhou 730000, China

<sup>3</sup>College of Resources and Environment, University of Chinese Academy of Sciences, Beijing 100049, China

<sup>4</sup>Deep Space Exploration Laboratory, Hefei 230088, Anhui, China.

<sup>5</sup>CAS Center for Excellence in Comparative Planetology, University of Science and Technology of China, Hefei 230026, Anhui, China

*Correspondence to:* Lei Geng ([genglei@ustc.edu.cn](mailto:genglei@ustc.edu.cn)) and/or Chun Zhao ([chunzhao@ustc.edu.cn](mailto:chunzhao@ustc.edu.cn))

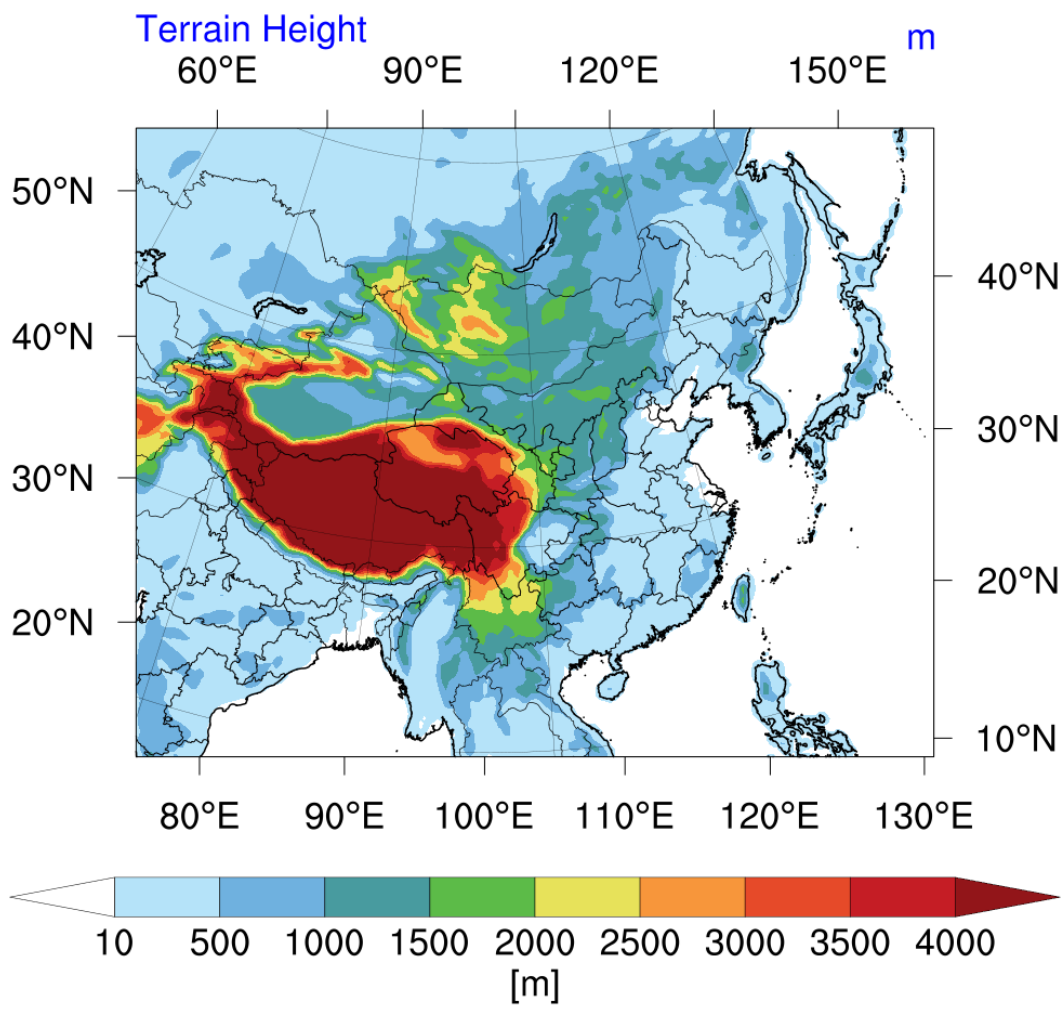

**Figure S1.** Simulation domain. The color shading represents the topography height (m)

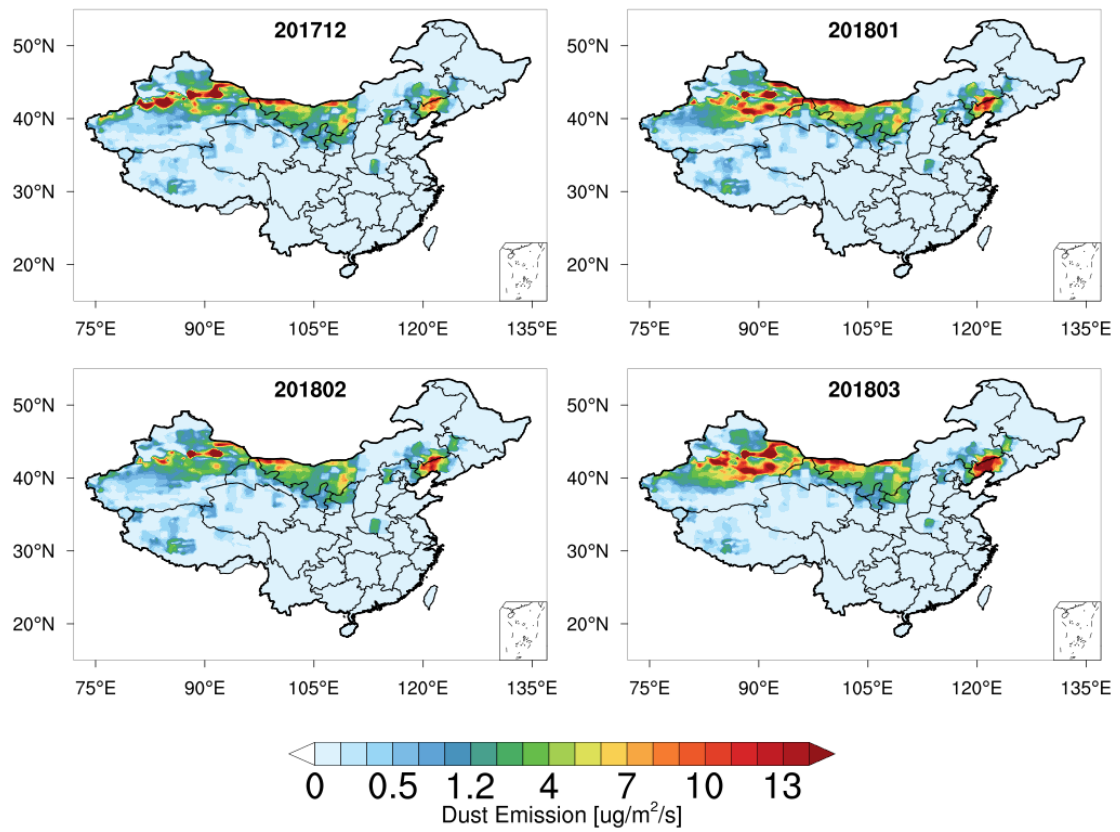

**Figure S2.** Spatial distribution of dust emissions ( $\mu\text{g}/\text{m}^2/\text{s}$ ) across China from December 2017 to March 2018.
